# Supplementary material for: Expression of modified FcγRI enables myeloid cells to elicit robust tumor-specific cytotoxicity
Source: eLife. 2024 Jun 17;12:RP91999. doi: 10.7554/eLife.91999 (PMC11182644; doi:10.7554/eLife.91999)
Supplement: Figure 1—source data 1. — (A) B16F10 tumor size (mm2) in mice following prophylactic immunization with MoDC pulsed with tumor cells coated with allogeneic IgG or IgM (n=4). (B) Percentage of B16F10 melanoma cells stained for Annexin V/PI incubated with allogenic IgG and IgM following incubation with MoDC (n=5). [file elife-91999-fig1-data1.xlsx]

## Sheet: Sheet1
Figure 1 - Source data 1: IgM-induced signaling elicits cytotoxic response in macrophages and can be integrated to a CAR design.
(A)
MoDC+ IgG-IC
	days post injection
	0	3	6	9	12	15	18	21	24	27	30
mouse 1	4	4	4	9	10.23	8.91	4	4	4	4	4
mouse 2	4	4	4	9.75	8.75	6.6	5.8	4	4	4	4
mouse 3	4	4	4	4	10.23	8.91	9.25	4	4	4	4
mouse 4	4	4	4	4	7.5	10.8	9.5	10.25	4	4	4
MoDC+ IgM-IC
	days post injection
	0	3	6	9	12	15	18	21	24	27	30
mouse 1	4	4	4	8.06	9.3	12.71	20.35	25.74	39.16	58.85
mouse 2	4	4	4	7	9.8	10.5	10.5	19.44	34.32	53.94
mouse 3	4	4	4	4	6	8.25	10.25	14.19	23.31	41.83
mouse 4	4	4	4	4	8.37	10.26	16.12	29.92	38.18	54.15
MoDC
	days post injection
	0	3	6	9	12	15	18	21	24	27	30
mouse 1	4	4	4	17.68	35.25	53.2	70.76	111.54
mouse 2	4	4	4	13.63	13.63	40.04	62.01	104.19
mouse 3	4	4	4	16.92	16.92	33.54	46.55	78.12
mouse 4	4	4	4	14.76	27.88	50.46	66.56	96.36
(B)
	DMEM	DC only	Allo
			129 IgG	129 IgM
% killing	3	2	5	51
	2	10	10	40
	6	5	12	66
	3.66667		9	52.3333
	2.08167		3.60555	13.0512
