# Supplementary material for: Expression of modified FcγRI enables myeloid cells to elicit robust tumor-specific cytotoxicity
Source: eLife. 2024 Jun 17;12:RP91999. doi: 10.7554/eLife.91999 (PMC11182644; doi:10.7554/eLife.91999)
Supplement: Figure 4—source data 1. — (A) qPCR data showing mRNA levels in RAW 264.7 transfected with GFP, Fc receptor-GFP, and αCD19-ScFv GFP (n=4). (B) LC-MS data results showing protein complexes pulled down using GFP magnetic beads in DC 2.4 6 hr post transfection with αCD19 ScFv GFP and GFP. (C) Flow cytometry data of CFSE dilution in CD8+ and CD4+ T cells following co-culture with ova conjugated scFv. [file elife-91999-fig4-data1.xlsx]

## Sheet: Sheet1
Figure 4 - source data 1: scFv fragments induce ER stress in myeloid cells.
(A)
Well	Sample Name	Target Name	Task	Reporter	Quencher	RQ	RQ Min	RQ Max	Cт	Cт Mean	Cт SD	ΔCт	ΔCт Mean	ΔCт SE	HK Control ΔCт Mean	HK Control ΔCт SE	ΔΔCт
assay2 T2
E1	RAW GFP T2	beta actin	UNKNOWN	SYBR	None				23.1534	22.9403	0.159115
E2	RAW GFP T2	beta actin	UNKNOWN	SYBR	None				22.7774	22.9403	0.159115
E3	RAW GFP T2	beta actin	UNKNOWN	SYBR	None				22.9519	22.9403	0.159115
E4	RAW GFP T2	beta actin	UNKNOWN	SYBR	None				22.8783	22.9403	0.159115
E5	RAW Fc T2	beta actin	UNKNOWN	SYBR	None				22.5933	22.5708	0.0247736
E6	RAW Fc T2	beta actin	UNKNOWN	SYBR	None				22.5411	22.5708	0.0247736
E7	RAW Fc T2	beta actin	UNKNOWN	SYBR	None				22.589	22.5708	0.0247736
E8	RAW Fc T2	beta actin	UNKNOWN	SYBR	None				22.5597	22.5708	0.0247736
E9	RAW CD19 T2	beta actin	UNKNOWN	SYBR	None				24.1858	25.7336	1.08926
E10	RAW CD19 T2	beta actin	UNKNOWN	SYBR	None				26.7256	25.7336	1.08926
E11	RAW CD19 T2	beta actin	UNKNOWN	SYBR	None				26.1235	25.7336	1.08926
E12	RAW CD19 T2	beta actin	UNKNOWN	SYBR	None				25.8996	25.7336	1.08926
F1	RAW GFP T2	neomycin	UNKNOWN	SYBR	None	1	0.826997	1.20919	22.7325	22.6052	0.157657		-0.335066	0.111997			0
F2	RAW GFP T2	neomycin	UNKNOWN	SYBR	None	1	0.826997	1.20919	22.3819	22.6052	0.157657		-0.335066	0.111997			0
F3	RAW GFP T2	neomycin	UNKNOWN	SYBR	None	1	0.826997	1.20919	22.6091	22.6052	0.157657		-0.335066	0.111997			0
F4	RAW GFP T2	neomycin	UNKNOWN	SYBR	None	1	0.826997	1.20919	22.6974	22.6052	0.157657		-0.335066	0.111997			0
F5	RAW Fc T2	neomycin	UNKNOWN	SYBR	None	0.530838	0.49811	0.565717	23.0611	23.1494	0.0708326		0.578589	0.0375199			0.913655
F6	RAW Fc T2	neomycin	UNKNOWN	SYBR	None	0.530838	0.49811	0.565717	23.1253	23.1494	0.0708326		0.578589	0.0375199			0.913655
F7	RAW Fc T2	neomycin	UNKNOWN	SYBR	None	0.530838	0.49811	0.565717	23.1918	23.1494	0.0708326		0.578589	0.0375199			0.913655
F8	RAW Fc T2	neomycin	UNKNOWN	SYBR	None	0.530838	0.49811	0.565717	23.2192	23.1494	0.0708326		0.578589	0.0375199			0.913655
F9	RAW CD19 T2	neomycin	UNKNOWN	SYBR	None	1.44496	0.39155	5.33243	23.3385	24.8675	1.08821		-0.866097	0.769852			-0.531031
F10	RAW CD19 T2	neomycin	UNKNOWN	SYBR	None	1.44496	0.39155	5.33243	25.876	24.8675	1.08821		-0.866097	0.769852			-0.531031
F11	RAW CD19 T2	neomycin	UNKNOWN	SYBR	None	1.44496	0.39155	5.33243	25.3041	24.8675	1.08821		-0.866097	0.769852			-0.531031
F12	RAW CD19 T2	neomycin	UNKNOWN	SYBR	None	1.44496	0.39155	5.33243	24.9515	24.8675	1.08821		-0.866097	0.769852			-0.531031
G1	RAW GFP T2	GFP	UNKNOWN	SYBR	None	1	0.665367	1.50293	24.3828	23.8932	0.45331		0.952985	0.240212			0
G2	RAW GFP T2	GFP	UNKNOWN	SYBR	None	1	0.665367	1.50293	23.8	23.8932	0.45331		0.952985	0.240212			0
G3	RAW GFP T2	GFP	UNKNOWN	SYBR	None	1	0.665367	1.50293	24.0756	23.8932	0.45331		0.952985	0.240212			0
G4	RAW GFP T2	GFP	UNKNOWN	SYBR	None	1	0.665367	1.50293	23.3146	23.8932	0.45331		0.952985	0.240212			0
G5	RAW Fc T2	GFP	UNKNOWN	SYBR	None	1.079	0.75119	1.54985	23.8488	23.4141	0.426302		0.843294	0.213511			-0.109691
G6	RAW Fc T2	GFP	UNKNOWN	SYBR	None	1.079	0.75119	1.54985	23.7103	23.4141	0.426302		0.843294	0.213511			-0.109691
G7	RAW Fc T2	GFP	UNKNOWN	SYBR	None	1.079	0.75119	1.54985	23.0739	23.4141	0.426302		0.843294	0.213511			-0.109691
G8	RAW Fc T2	GFP	UNKNOWN	SYBR	None	1.079	0.75119	1.54985	23.0233	23.4141	0.426302		0.843294	0.213511			-0.109691
G9	RAW CD19 T2	GFP	UNKNOWN	SYBR	None	1.08567	0.299528	3.93514	25.1655	26.568	1.05801		0.834397	0.759253			-0.118588
G10	RAW CD19 T2	GFP	UNKNOWN	SYBR	None	1.08567	0.299528	3.93514	27.1253	26.568	1.05801		0.834397	0.759253			-0.118588
G11	RAW CD19 T2	GFP	UNKNOWN	SYBR	None	1.08567	0.299528	3.93514	27.592	26.568	1.05801		0.834397	0.759253			-0.118588
G12	RAW CD19 T2	GFP	UNKNOWN	SYBR	None	1.08567	0.299528	3.93514	26.3894	26.568	1.05801		0.834397	0.759253			-0.118588
	GFP	Fc receptor GFP	aCD19 GFP
relative mRNA expression (ΔΔCT)	1.307	1.44899	1.51309
	1	1.07899	1.0856
	0.693	0.77199	0.6582
(B)
T test FDR 0.1 S0 0.1
Tpd52l2	vsicles
Snx3	Sorting nexin	protein transport
Arhgef2	sensor PRR	numerous cellular processes that are initiated by extracellular stimuli that work through G protein-coupled receptors.
Arfgap1	not known	membrane trafficking and /or vesicle transport
Arhgef7	not known	cell migration, attachment and cell spreading
Fhl3	actin binding	myogenesis and actin organization
Tagln2	actin binding	cadherin binding
Crtc3	transcription coactivator	macrophage activation and viral process
Dnttip2	not known	RNA binding
Ttc1	not known	unfolded protein binding
AI607873	not known	innate immune activation, response to IFN beta
Sgta	not known	protein insertion to ER, viral process, ubiquitin-dependent ERAD pathway, regulation of ER-associated ubiquitin-dependent protein catabolic process, regulation of chaperone-mediated protein folding
Fam83h	not known	cytoskeleton organization and cell migration
Nudcd2	not known	unfolded protein binding
Cep85	centrosomes	centrosome seperation
Mki67		cell proliferation
Pdcd2	rBCL6 repression	apoptosis
Ncor2	transcriptional coregulatory protein	transcription regulation
Hist1h1e		DNA binding, histone
Hist1h1b		DNA binding, histone
Dcaf8	protein ubiquitination	protein ubiquitination and modification
Ubap2	ubiquitination pathway	ubiquitination pathway
Sec16a	Stress Granule essiential	organization of ER exit sites
Gigyf2	RNA binding stress granules	posttranscriptional gene silencing
Zpr1	Stress Granule associated	cell proliferation
Serbp1	RNA binding stress granules associated	RNA stability and apoptotic process
Cnot2	transcriptional regulation stress granules associated	mRNA degradation, miRNA-mediated repression, translational repression, general transcription regulation
Nolc1	regulation of rRNA transcription stress granules associated	regulation of rRNA transcription stress granules associated
Tacc1	Stress Granule associated	transcription regulation
Zfp36l2;Zfp36l1	Stress Granule associated	RNA processing and transport
Fkbp4	co-chaperones stress granules	chaperone mediated protein folding
Tmpo	stress granules associated	DNA Binding
Ybx1	RNA binding	DNA and RNA binding
Ybx3	RNA binding	DNA binding, transcription regulation
G3bp1	stress-granules	stress granule assmebly, innate immune response, viral defense
Caprin1	stress ganules dsRNA binding	regualtion of translation
Parp12	stress-granules	Protein mono-ADP-ribosyltransferase
Nob1	mRNA degradation	rRNA processing
Ddx3x;D1Pas1	RNA binding stress granules	ER stress, stress granule assembly, cell response to virus, innateresponse, inflammation response
Rps11	Ribosome subunits	40S ribosomal subunit S11
Rps19	Ribosome subunits	40S ribosomal subunit S9
Rpl6	Ribosome subunits	60S ribosomal subunit L6
Rpl29;Gm3550	Ribosome subunits	60S ribosomal subunit L29
Rpl37a	Ribosome subunits	60S ribosomal subunit L37a
Rpl23a	Ribosome subunits	60S ribosomal subunit L23a
Rpl23	Ribosome subunits	60S ribosomal subunit L23
Rps26	Ribosome subunits	40S ribosomal subunit S26
Rpl31	Ribosome subunits	60S ribosomal subunit L31
Rpl8	Ribosome subunits	60S ribosomal subunit L8
Rpl35a	Ribosome subunits	60S ribosomal subunit L35a
Ythdf2	regulates mRNA stability stress granules	innate immune response, stress granule assembly, RNA binding
Adar	RNA binding stress granules	innate immune response, response to virus
Bag2	Hsp70 cochaperone stress granules associated	chaperone, protein folding
Bag4	Hsp70 cochaperone stress granules associated	chaperone, protein folding and stabilization
Raver1	RNA-binding stress granules	RNA splicing
Rnf115	Stress granules associated	ubiquitin ligase
Eif3j1;Eif3j2	Stress granules associated	Component of the eukaryotic translation initiation factor 3
Eif3h	Stress granules associated	Component of the eukaryotic translation initiation factor 4
Eif4enif1	Stress granules associated	regulates translation and stability of mRNAs in processing bodie
Eif3i	Stress granules associated	Component of the eukaryotic translation initiation factor 3
Eif3g	Stress granules associated	Component of the eukaryotic translation initiation factor 4
identified only in CD19_1 and CD19_3	only in cd19 (all samples)	only in cd19_1 and cd19_2	only in cd19_2 and cd19_3
Tcf4	Fam83h	Ube2v1/Ube2v2	Fli1/Erg
Ttc1	Mki67		Znf281
Ythdf1	Scel		Spc24
Irf2bp2	Gtf3c5
Chtf8
Spi1
Gpatch4
Pes1
(J) Percentage of cells expressing GFP or TRP-TCR1 24 hours following transfection (n=3).
HEK 293
	GFP	TRP1-TCR
% transfected cells	95.3	6.63
	94.6	7.99
	94.4	8.07
RAW 264.7
	GFP	TRP1-TCR
% transfected cells	18.5	0
	19.6	0
	19.6	0
(C)
	OTII + ova	OTII + scFv	OTI + ova	OTI + scFv
%cell proliferation	26.6	27.2	16.2	18.2
	17.7	39	14.6	21.1
	37.9	33.7	13.2	24.5
	17.9	34.7	16.2	17.5
