# Supplementary material for: Expression of modified FcγRI enables myeloid cells to elicit robust tumor-specific cytotoxicity
Source: eLife. 2024 Jun 17;12:RP91999. doi: 10.7554/eLife.91999 (PMC11182644; doi:10.7554/eLife.91999)
Supplement: Figure 5—source data 1. — (A) Tumor size measurements (mm2) in mice treated with mRNA transfected BMDC with and without antibody (n=6). (B) Mean percentages of CD3+ out of CD45+ cells in B16F10 tumors from day 26 (n=4). [file elife-91999-fig5-data1.xlsx]

## Sheet: Sheet1
Figure 5 - source data 1: FcgRI can provide a scaffold for incorporating IgM-induced signaling in myeloid cells and endows them with tumor cell-specific killing ability
(A)
Untreated
	days post injection
	0	4	8*	12	15*	19	22	26			*days of treatment
mouse 1	4	4	10.23	30.78	46.48	66.5
mouse 2	4	4	13.25	46.4	70.04	141.52
mouse 3	4	4	12.88	28	84.49	314.5
mouse 4	4	4	7.5	86.25	124.62	153.6
mouse 5	4	4	18	57.04	75.65	43.2
sham BMDC+ TA99
	days post injection
	0	4	8*	12	15*	19	22	26
mouse 1	4	4	15.84	6	69	127.2	122.76
mouse 2	4	4	11.2	4	23.79	72	115.36
mouse 3	4	4	16.5	64.2	76.65	230
mouse 4	4	4	10.25	36.26	17.75	39
mouse 5	4	4	6.6	50.85	21.12	61.06
am BMDC
	days post injection
	0	4	8*	12	15*	19	22	26
mouse 1	4	4	10.36	23.18	29.75	75	119.07
mouse 2	4	4	9.9	6	41.18	67.5	120
mouse 3	4	4	12.24	6	42.6	51.3	143.91
mouse 4	4	4	15.86	20.72	23.78	33	205.67
mouse 5	4	4	16.8	24.5	10	16	136.17
am BMDC + TA99
	days post injection
	0	4	8*	12	15*	19	22	26
mouse 1	4	4	11.28	4	17.22	30.24	33.75	24
mouse 2	4	4	10.2	11.44	23.46	6	34.86	4
mouse 3	4	4	10.92	10.6	9	6	16	4
mouse 4	4	4	12.1	6	9	6	12	32.5
mouse 5	4	4	11.1	24.5	19.25	36	21	9
(B)
	untreated	am BMDC + TA99
%CD3 cells	6.7	15.1
	2.9	26.3
	9.1	22.7
	7.1	12.7
